# Supplementary material
Source: publisher site journal article supplement (https://www.dovepress.com/article/400646)

## **Supplementary materials**

**Figure S1.** Number of mortality rate (A), DALY rate (C) of kidney cancer by age and sex, from 1990 to 2019 in China; EAPC of mortality rate (B) and DALY rate (D) of kidney cancer by age and sex in 2019 in China. DALY, disability-adjusted life-years, EAPC, estimated annual percentage change.

**Figure S2.** Age-standardized DALY rate per 100,000 population by the province of China in 1990 (A) and age-standardized DALY rates for kidney cancer and SDI by province, for 1990 (B). DALY, disability-adjusted life-years, SDI, social-demographic index.

**Figure S3.** Rates of DALYs of kidney cancer attributable to risk factors by age and sex, from 1990 to 2019 in China. DALY, disability-adjusted life-years.

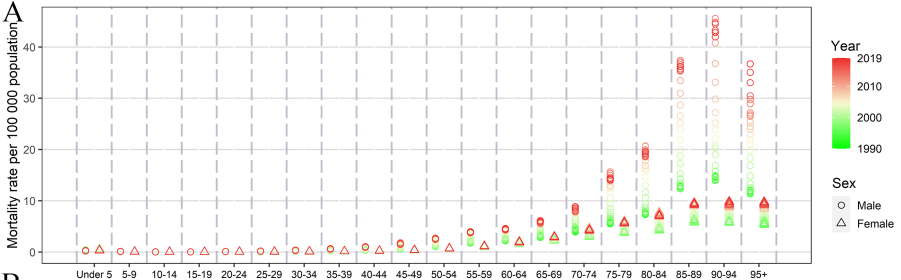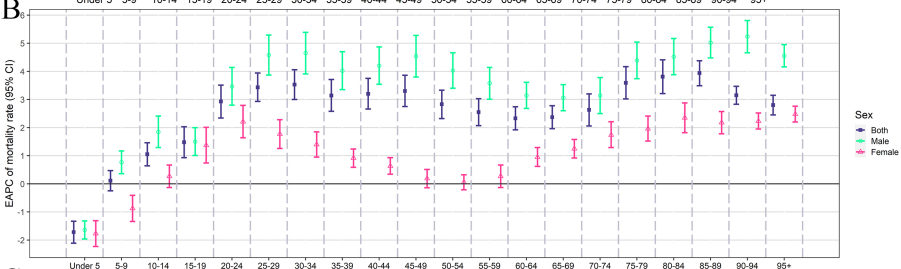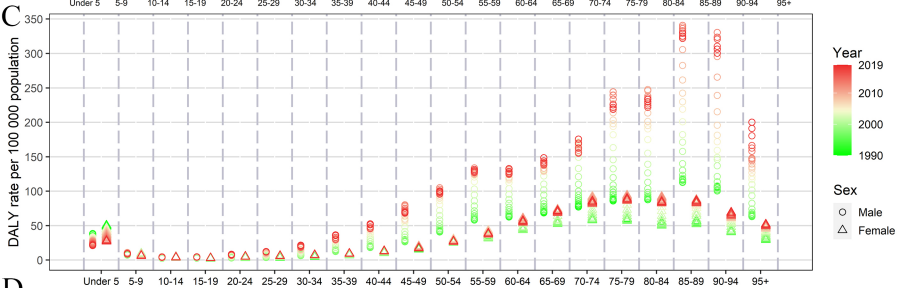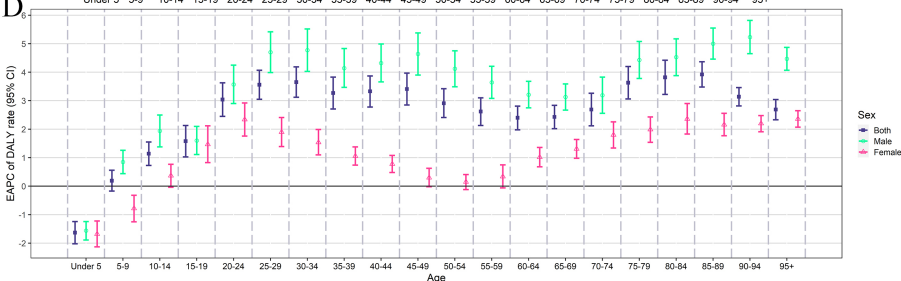

A

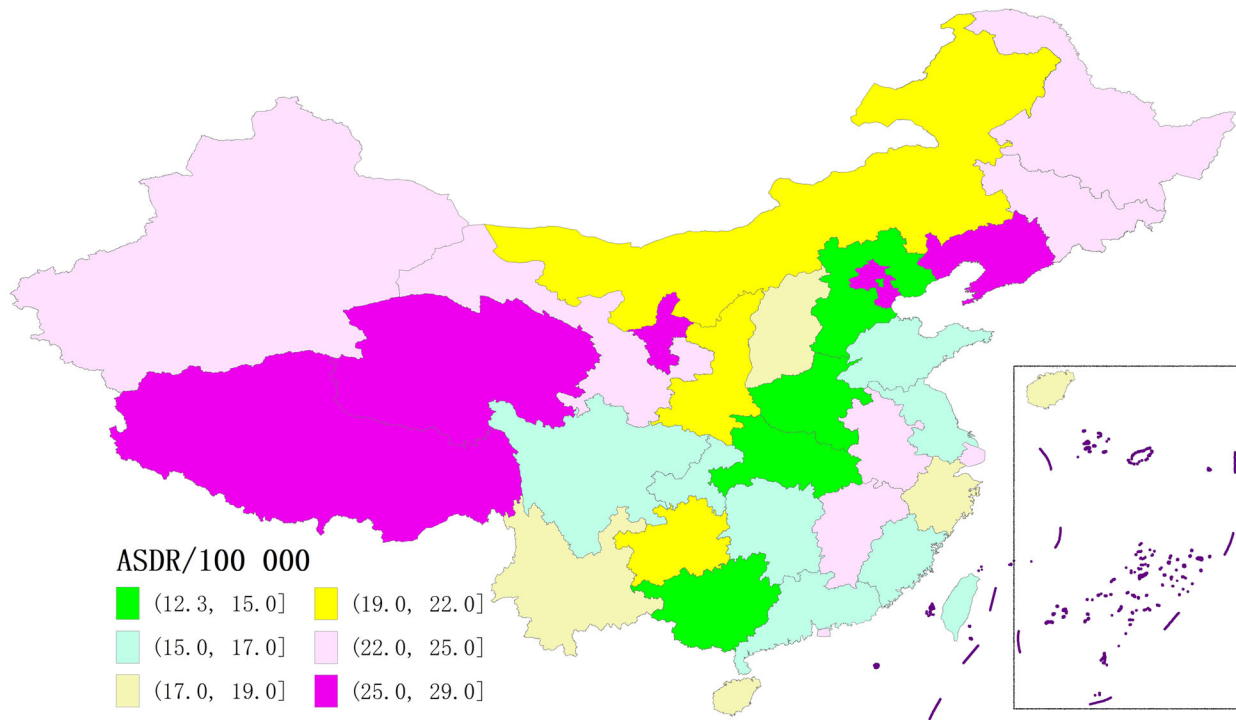

B

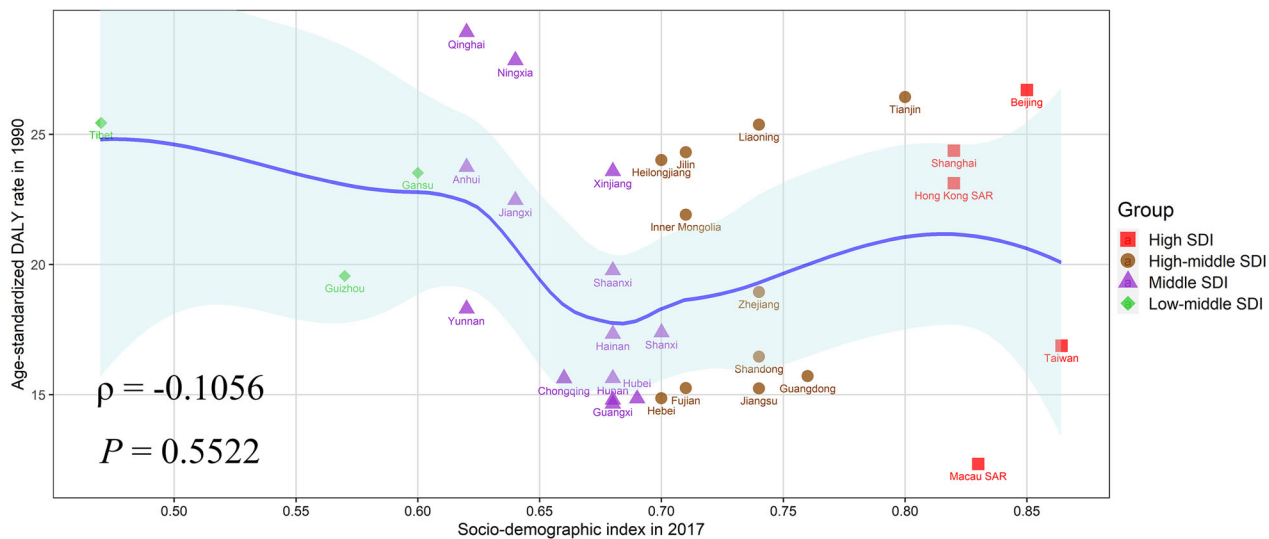

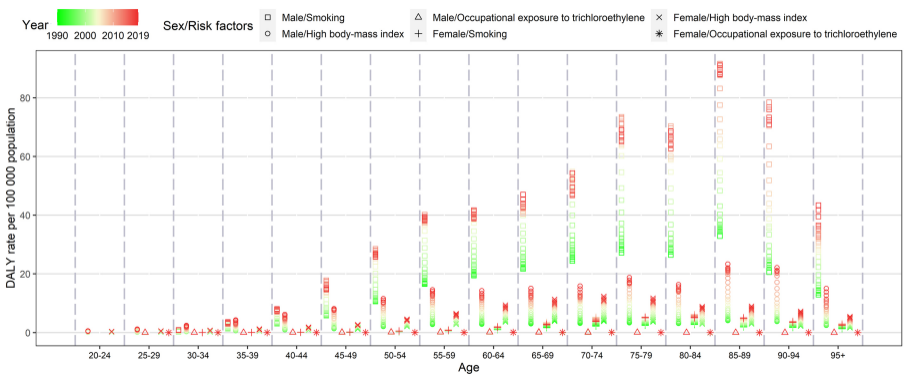

Supplement: Supplementary file 1 [file get_supplementary_file.php]
